# Supplementary material
Source: publisher site journal article supplement (http://www.kjim.org/upload/media/kjim-2019-357-suppl.pdf)
Supplement: Supplementary file 1 [file kjim-2019-357-suppl.pdf]

**Supplementary Table 1. List of patients that showed elevated alanine aminotransferase levels during elbasvir/grazoprevir therapy for genotype 1 hepatitis C infection**

| No. | Age, yr | Sex    | Genotype | RNA, IU/L  | Liver cirrhosis | GFR, mL/min/1.73 m <sup>2</sup> | SVR     | Week of ALT flare | ALT (at each week of treatment), IU/L |     |    |     |     |        |        |
|-----|---------|--------|----------|------------|-----------------|---------------------------------|---------|-------------------|---------------------------------------|-----|----|-----|-----|--------|--------|
|     |         |        |          |            |                 |                                 |         |                   | 0                                     | 2   | 4  | 8   | 12  | Post12 | Post24 |
| 1   | 74      | Female | 1        | 832,154    | No              | 131                             | Yes     | 8                 | 15                                    | -   | 60 | 85  | 88  | 100    | -      |
| 2   | 66      | Female | 1b       | 904,431    | No              | 165                             | Yes     | 2                 | 67                                    | 135 | 55 | 101 | 97  | 39     | 41     |
| 3   | 64      | Female | 1b       | 26,086     | No              | 76                              | Yes     | 12                | 17                                    | -   | 16 | 17  | 136 | 9      | 5      |
| 4   | 45      | Male   | 1b       | 862,909    | No              | 106                             | Yes     | 8                 | 34                                    | -   | 47 | 84  | 50  | 52     | 34     |
| 5   | 52      | Male   | 1b       | 526,000    | No              | 93                              | Yes     | 8                 | 132                                   | 36  | 43 | 92  | 75  | 25     | 38     |
| 6   | 54      | Male   | 1b       | 91,400     | No              | 138                             | Yes     | 12                | 16                                    | -   | 14 | 18  | 91  | 87     | 24     |
| 7   | 62      | Male   | 1b       | 17,900,000 | No              | 97                              | Yes     | 12                | 33                                    | -   | 56 | 57  | 81  | 56     | 64     |
| 8   | 77      | Female | 1b       | 2,920,000  | No              | 87                              | FU loss | 4                 | 41                                    | -   | 89 | 105 | 71  | -      | -      |
| 9   | 53      | Male   | 1b       | 20,900,000 | Yes             | 42                              | Yes     | 8                 | 64                                    | -   | 63 | 87  | 218 | 19     | -      |
| 10  | 73      | Female | 1b       | 105,840    | No              | 82                              | Yes     | 8                 | 132                                   | -   | 13 | 89  | 18  | 11     | -      |
| 11  | 79      | Female | 1b       | 2,150,000  | No              | 72                              | Yes     | 4                 | 13                                    | -   | 88 | 9   | 9   | 7      | 8      |

GFR, glomerular filtration rate; SVR, sustained virological response; ALT, alanine aminotransferase; FU, follow-up.
